# Supplementary material for: Genes for degradation and utilization of uronic acid-containing polysaccharides of a marine bacterium Catenovulum sp. CCB-QB4
Source: PeerJ. 2021 Mar 9;9:e10929. doi: 10.7717/peerj.10929 (PMC7953866; doi:10.7717/peerj.10929)
Supplement: Supplemental Information 8 [file peerj-09-10929-s008.xlsx]

## Sheet: Sheet1
Growth confirmation of QB4 cultured with saturated galacturonate (Sat. Gal). The growth was measured as optical density (OD600nm).
The growth was measured as optical density (OD600nm).
Media with and without 0.2% glucose was used as positive (Glu) and negative controls (NC), respectively.
All data shown are mean values from three replicate experiments. Error bars denote the standard deviation of triplicate samples.
Growth test with glucose							Growth test with saturated galacturonate
time	1st	2nd	3rd	average	stdevp		Gal. mono.	1st	2nd	3rd	average	stdevp
0	0.023	0.09	0.013	0.042	0.0341858		0	0.003	0	0	0.001	0.00141421
3	0.008	0.002	0.011	0.007	0.00374166		3	0.002	0.009	0.003	0.00466667	0.00309121
6	0.004	0.019	0.013	0.012	0.00616441		6	0	0	0	0	0
9	0.058	0.054	0.054	0.0553333	0.00188562		9	0	0.005	0	0.00166667	0.00235702
12	0.175	0.171	0.184	0.176667	0.0054365		12	0	0.006	0.005	0.00366667	0.00262467
15	0.625	0.56	0.637	0.607333	0.0338264		15	0	0	0	0	0
18	1.109	1.116	1.121	1.11533	0.00492161		18	0	0.007	0.006	0.00433333	0.00309121
21	1.366	1.317	1.36	1.34767	0.0218225		21	0	0.004	0	0.00133333	0.00188562
24	1.417	1.411	1.439	1.42233	0.012037		24	0	0.008	0.007	0.005	0.00355903
27	1.477	1.479	1.504	1.48667	0.0122837		27	0	0	0	0	0
30	1.516	1.487	1.511	1.50467	0.0126579		30	0	0	0	0	0
collection of data (average)							Negative control.
time	Glu	Sat. Gal	NC				NC	1st	2nd	3rd	average	stdevp
0	0.042	0.001	0.004				0	0.007	0.006	0	0.00433333	0.00309121
3	0.007	0.005	0.009				3	0.011	0.009	0.006	0.00866667	0.0020548
6	0.012	0	0				6	0	0	0	0	0
9	0.055	0.002	0.009				9	0.017	0.005	0.005	0.009	0.00565685
12	0.177	0.004	0.002				12	0	0.006	0	0.002	0.00282843
15	0.607	0	0.001				15	0	0.003	0	0.001	0.00141421
18	1.115	0.004	0.002				18	0	0.007	0	0.00233333	0.00329983
21	1.347	0.001	0.009				21	0.006	0.011	0.01	0.009	0.00216025
24	1.422	0.005	0.001				24	0	0.004	0	0.00133333	0.00188562
27	1.487	0	0				27	0	0	0	0	0
30	1.504	0	0.017				30	0.034	0.017	0	0.017	0.0138804
collection of data (stdevp)
0	0.003	0.001	0.003
3	0.004	0.003	0.002
6	0.006	0	0
9	0.002	0.002	0.006
12	0.005	0.003	0.002
15	0.034	0	0.001
18	0.005	0.004	0.002
21	0.022	0.001	0.002
24	0.012	0.004	0.001
27	0.012	0	0
30	0.013	0	0.013
